# Supplementary material for: Simultaneous effect of Na2EDTA on the phase transformation and morphology evolution during the transformation of gypsum into α-calcium sulfate hemihydrate
Source: Royal Society of Chemistry journal article supplement (doi:10.1039/d3nj05657k), 2024-01-01
Supplement: d3nj05657k1.pdf [file d3nj05657k1.pdf]

# **Simultaneous function of Na<sub>2</sub>EDTA on phase transformation and morphology evolution during the transformation of gypsum into $\alpha$ -calcium sulfate hemihydrate**

Anni Xiao,<sup>abc</sup> Caiyun Jia,<sup>\*abc</sup> Xiaoxia Fang,<sup>abc</sup> Jiang Zhao,<sup>abc</sup> Haijun Zhang<sup>\*abc</sup>

\* Corresponding authors

<sup>a</sup> School of Chemical Engineering and Technology, China University of Mining and Technology, Xuzhou 221116, China

**Email:** [zhjcumt@163.com](mailto:zhjcumt@163.com)

<sup>b</sup> National Engineering Research Center of Coal Preparation and Purification, China University of Mining and Technology, Xuzhou 221116, China

<sup>c</sup> National Key Laboratory of Coking Coal Resources Green Development, China University of Mining and Technology, Xuzhou 221116, China

**E-mail:** [jiacaiyun2014@zju.edu.cn](mailto:jiacaiyun2014@zju.edu.cn)

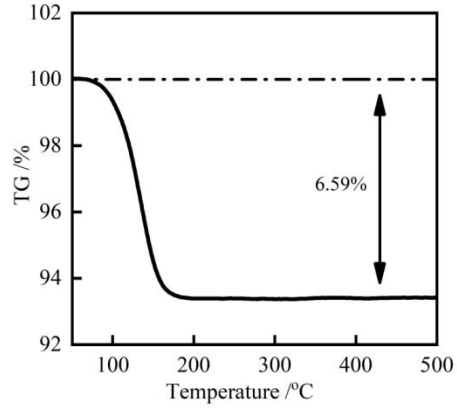

figure s1 TG curves of the final sample prepared from transformation of gypsum in the presence of 0.15 mM  $\text{Na}_2\text{EDTA}$

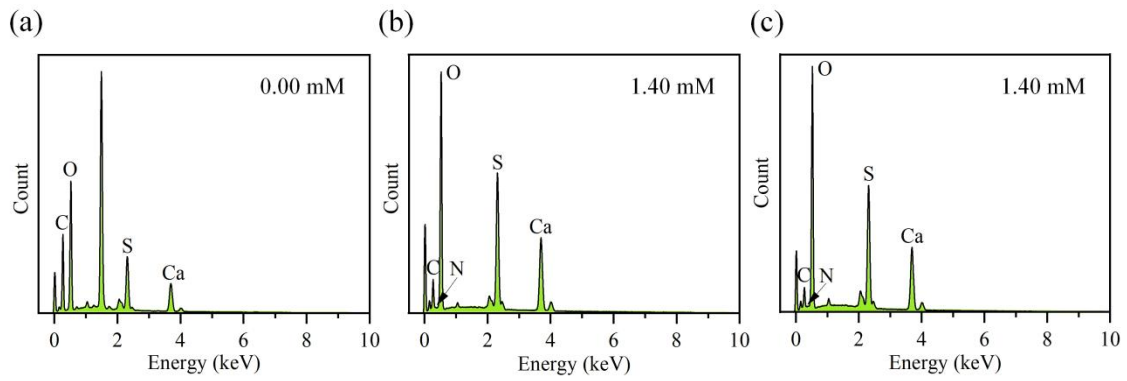

figure s2 EDS spectra of  $\alpha$ -HH crystals obtained at different  $\text{Na}_2\text{EDTA}$  concentrations at 90 °C: (a) 0.00 mM, (b) 1.40 mM, (c) 1.40 mM.

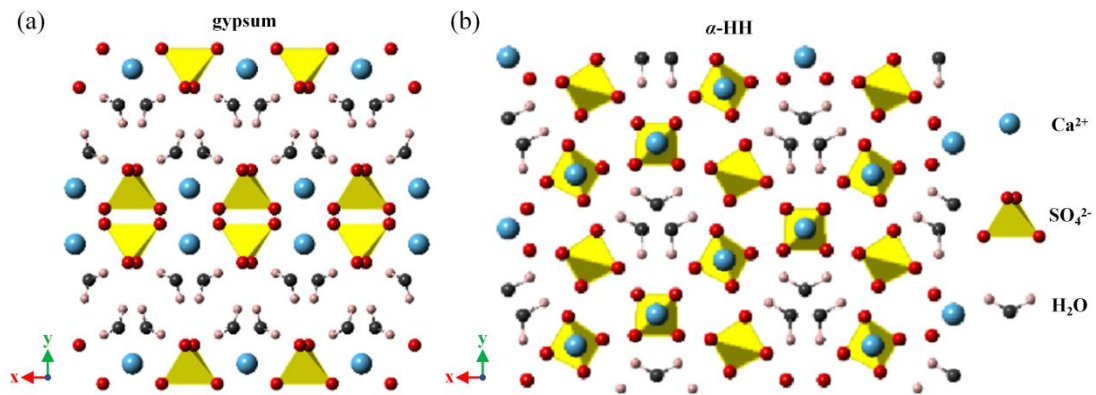

figure s3 The specific crystal structures of gypsum and  $\alpha$ -HH
